# Supplementary material for: Acoustic-driven magnetic skyrmion motion
Source: Springer Nature journal article supplement (doi:10.1038/s41467-024-45316-w), 2024-02-03
Supplement: 41467_2024_45316_MOESM2_ESM.pdf [file 41467_2024_45316_MOESM2_ESM.pdf]

**Title:** Supplementary Movie 1:

**Description:** This movie contains the whole set of images shown in Fig. 3a-d, in which  $Q = +1$  skyrmion motion after exciting SH wave pulses.

**Title:** Supplementary Movie 2:

**Description:** This movie contains the whole set of images shown in Fig. 3e-h, in which  $Q = -1$  skyrmion motion after exciting SH wave pulses.
